# Supplementary material
Source: PubMed Central journal article supplement (PMC10685906)
Supplement: NIHMS1877106-supplement-supplement.pdf [file NIHMS1877106-supplement-supplement.pdf]

## Supplementary Appendix

Supplement to: The National Heart, Lung, and Blood Institute Prevention and Early Treatment of Acute Lung Injury Clinical Trials Network. Early restrictive or liberal fluid management for sepsis-induced hypotension. N Engl J Med 2023;388:499-510. DOI: 10.1056/NEJMoa2212663

This appendix has been provided by the authors to give readers additional information about the work.

# Early Restrictive Versus Liberal Fluid Management for Sepsis-induced Hypotension

## Online Supplement

|                                                                                                                                                                                                                             |    |
|-----------------------------------------------------------------------------------------------------------------------------------------------------------------------------------------------------------------------------|----|
| Contents                                                                                                                                                                                                                    |    |
| <b>Collaborators</b> .....                                                                                                                                                                                                  | 3  |
| <b>Complete Listing of Study Enrollment Criteria</b> .....                                                                                                                                                                  | 6  |
| <b>Tables</b> .....                                                                                                                                                                                                         | 7  |
| <b>Table S1.</b> Additional baseline characteristics.....                                                                                                                                                                   | 7  |
| <b>Table S2.</b> Initial consent obtained from the patient or from a surrogate.....                                                                                                                                         | 9  |
| <b>Table S3:</b> Intravenous Fluid Administration by Study Arm After Protocol Period.....                                                                                                                                   | 10 |
| <b>Table S4.</b> Types and amounts of fluids received during 24-hour protocol period<br>- Restrictive Fluid Group.....                                                                                                      | 11 |
| <b>Table S5:</b> Types and amounts of fluids received during 24-hour protocol period - Liberal Fluid Group<br>.....                                                                                                         | 12 |
| <b>Table S6.</b> Adherence to study protocol treatment guidance across time .....                                                                                                                                           | 13 |
| <b>Table S7.</b> Description and Impact of Change to Fluid Liberal Protocol in CLOVERS October 2019<br>Amendment .....                                                                                                      | 14 |
| <b>Table S8.</b> ICU admission rate for each study arm.....                                                                                                                                                                 | 15 |
| <b>Table S9.</b> DSMB Futility Assessment at Second Interim Analysis .....                                                                                                                                                  | 16 |
| <b>Table S10:</b> Mortality Estimate at 2 <sup>nd</sup> Interim .....                                                                                                                                                       | 16 |
| <b>Table S11.</b> Patient location and vital status to day 90.....                                                                                                                                                          | 17 |
| <b>Table S12.</b> Reported Adverse events during hospitalization by organ system and severity .....                                                                                                                         | 18 |
| <b>Table S13.</b> Specific adverse events during hospitalization and severity.....                                                                                                                                          | 19 |
| <b>Table S14.</b> Listing of adverse events during hospitalization - Restrictive Fluid Group .....                                                                                                                          | 21 |
| <b>Table S15.</b> Listing of Adverse events during hospitalization - Liberal Fluid Group.....                                                                                                                               | 24 |
| <b>Table S16.</b> New ventilation and oxygen use prior to and during the 24-hour protocol period .....                                                                                                                      | 27 |
| <b>Table S17.</b> Line complications during hospitalization related to central venous catheter placement<br>among patients who had a central venous line inserted between randomization and 72 hours .....                  | 28 |
| <b>Table S18:</b> Additional outcomes .....                                                                                                                                                                                 | 29 |
| <b>Table S19.</b> Complications of peripheral venous catheter vasopressor infusion to day 28 among patients<br>who received vasopressors through a peripheral catheter inserted between randomization and 72 hours<br>..... | 30 |
| Table S20. Representativeness of study participants in the CLOVERS trial.....                                                                                                                                               | 31 |
| <b>Table S21.</b> Comparison of CLOVERS with Other Studies.....                                                                                                                                                             | 32 |
| <b>Figures</b> .....                                                                                                                                                                                                        | 33 |
| <b>Figure S1.</b> CONSORT flow diagram. ....                                                                                                                                                                                | 33 |

|                                                                                                                                                                                                 |    |
|-------------------------------------------------------------------------------------------------------------------------------------------------------------------------------------------------|----|
| <b>Figure S2.</b> Fluid volumes and vasopressor hours stratified by treatment groups. (a) Fluid volumes during 0-6 hours, (b) fluid volumes during 0-24 hour, (c) total vasopressor hours. .... | 34 |
| <b>Figure S3.</b> Total fluid volume stratified by treatment groups .....                                                                                                                       | 35 |
| <b>Figure S4.</b> Survival curve: patients who survived to discharge home during the first 90 days after randomization.....                                                                     | 36 |
| <b>Figure S5.</b> Patients who survived to 28-day and were (a) vasopressor-free, (b) ventilator-free and (c) support-free (ventilator-free, vasopressor-free and RRT-free). ....                | 37 |
| <b>Figure S6.</b> Additional subgroup analysis. ....                                                                                                                                            | 40 |
| <b>Figure S7:</b> Risk Difference Stratified by Site.....                                                                                                                                       | 41 |
| <b>Supplement References</b> .....                                                                                                                                                              | 42 |

## Collaborators

### **Crystalloid Liberal or Vasopressors Early Resuscitation in Sepsis (CLOVERS)**

#### **The National Heart, Lung, and Blood Institute Prevention and Early Treatment of Acute Lung Injury (PETAL) Clinical Trials Network:**

**ALIGN Clinical Center:** Baystate Medical Center –Jay S Steingrub\*, Howard Smithline, Mark Tidswell, Lori Kozikowski, Sherell Thornton-Thompson, Lesley De Souza, Cynthia Kardos, Sarah Romain, Scott Oullette; Brigham and Women’s Hospital –Peter Hou\*, Rebecca M Baron, Anthony F Massaro, Imoigele P Aisiku, Raghu R Seethala, Lauren N Precopio; University of Florida—Torben K Becker, Christa M Campbell, Elida Benitez, Marie-Carmelle Elie, Matthew Shaw, Tori X Tran; Yale New Haven Hospital—Charles R Wira III, Carolyn Brokowski, Jonathan M Siner, Justin B Belsky, Lauren E Ferrante, John E Sather, Ani Aydin

**BOSTON Clinical Center:** Beth Israel Deaconess Medical Center –Nathan I Shapiro\*, Daniel Talmor\*, Valerie Banner-Goodspeed, Thomas O’Mara, Charlotte Kirk, Kelly Harrison, Lisa Kurt, Margaret Schermerhorn, Katherine Boyle, Nicole Dubosh, Sharon Hayes, Eric Hyder, David Chiu, Oren Mechanic, Ted Raddell, Lihini Keenawinna, Kostas Andreo; Massachusetts General Hospital –Michael R Filbin, Kathryn Hibbert, Blair Alden Parry, Kendall Lavin-Parsons, Natalie Pulido; University of Mississippi Medical Center –Alan E Jones, James Galbraith, Rebekah Peacock, Utsav Nandi; Hennepin County Medical Center—Michael A Puskarich, Matthew E Prekker, Audrey Hendrickson, Jamie Stang, Paige DeVries; St. Vincent Hospital—David Miru, Andre de Souza Licht, Pam Sigel, Patricia Arsenault; University of Minnesota Medical Center—Michael A Puskarich, Ronald A Reilkoff, Eric Jatton, Abbey Staugaitis

**CALIFORNIA Clinical Center:** UCSF San Francisco –Michael Matthay\*, Kimberly Yee, Kimia Ashktorab, Anika Agrawal, Rachel Gropper; UCLA—Steven Y Chang, Gregory W Hendey\*, George Lim, Nida Qadir, Andrea Tam, Rebecca Beutler; Stanford University Hospital –Joseph E Levitt, Jenny G Wilson, Angela J Rogers, Rosemary Vojnik, Jonasel Roque; UC Davis –Timothy E Albertson, James A Chenoweth, Christian Sandroock, Skyler J Pearson, Erin Hardy; UCSF Fresno –Alyssa Hughes, Kyndra Sousa, Kinsley Hubel, Eyad Almasri; University of Texas –Elizabeth Vidales, Bela Patel, Ryan Huebinger

**COLORADO Clinical Center:** University of Colorado Hospital –Adit A Ginde\*, Marc Moss\*, Neil Aggarwal, Jeffrey McKeehan, Lani Finck, Carrie Higgins, Michelle Howell; Denver Health Medical Center –Ivor S Douglas, Jason Haukoos, Stacy Trent, Terra Hiller,Carolynn Lyle, Ana Garcia, Stephanie Gravitz

**MICHIGAN Clinical Center:** University of Michigan Medical Center –Ivan N Co, Pauline K Park\*, Robert Hyzy\*, Kristine Nelson, J Victor Jimenez, Christopher M-C Fung, Jakob I McSparron, Norman Olbrich, Sinan Hanna; Indiana University –Mark Williams, Raj Kapoor, Jean Nash, Meghan Willig; Wayne State University—Robert Sherwin, Robert Ehrman, James Paxton, John Wilburn

**MONTEFIORE-SINAI Clinical Center:** Montefiore Moses—Michelle Ng Gong\*, Ari Moskowitz, Rahul Nair, William Nkendirim, Hiwet Tzehaie; Montefiore Weiler –Jen-Ting Chen, Amira Mohamed, Brenda Lopez, Sabah Boujrid, Manuel Hache Marliere; Mt. Sinai

Hospital—Lynne D Richardson\*, Kusum Mathews, Patrick Maher, Samuel Acquah, Neha Goel  
University of Arizona— Jarrod M Mosier, Cameron Hypes, Bhupinder Natt, Bryan A Borg,  
Elizabeth Salvagio Campbell

**OHIO Clinical Center:** University of Cincinnati Medical Center –Kristin M Hudock, Opeolu Adeoye, R. Duncan Hite, Evan L Ramser, Michael Hellman, Autumn Cresie, Sara Keegan;  
Cleveland Clinic Foundation –Abhijit Duggal\*, Siddharth Dugar, Omar Mehkri, Andrei Hastings, Kiran Ashok, Stephanie Stoianoff; Ohio State University Wexner Medical Center–  
Matthew C Exline, Jason J Bischof, Thomas E Terndrup, Henry E Wang, Joshua A Englert,  
Jennifer A Frey, Sarah C Karow ; Northwestern University—D. Mark Courtney, Richard Wunderink, Helen Donnelly, Megan Rowland, Kate Piserchia

**PACIFIC NORTHWEST Clinical Center:** Harborview Medical Center –Nicholas J Johnson, Bryce RH Robinson\*, Catherine L Hough\*, Stephanie Gundel, Sakshi Seghal, Sarah Katsandres, Kelsey Jiang, Sarah Dean, Megan Fuentes, Maranda Newton, Emily Petersen; Oregon Health and Science University –Akram Khan, Olivia Krol, Milad Karami Jouzestani, Makrina Kamel, Ebaad Haq, Zach Zouyed; Cedars Sinai Medical Center—Peter Chen, Sam Torbati, Susan Jackman, Niree Hindoyan, Joseph Meza; Swedish Hospital First Hill—Shane O’Mahony, Julie Wallick, Alexandra Duven, Dakota Fletcher

**PITTSBURGH Clinical Center:** UPMC Presbyterian, Shadyside & Mercy—Alexandra Weissman, Donald M Yealy\*, Sarah McGarry, Bryan J McVerry, David T Huang, Michael A Turturro, Derek C Angus\*; Penn State Hershey Medical Center – Jordan Schooler, Lawrence E Kass; Temple University Hospital—Nina T Gentile, Nathaniel Marchetti, Hannah Reimer

**SOUTHEAST Clinical Center:** Wake Forest Baptist Health –D. Clark Files\*, Kevin W Gibbs, Chadwick Miller\*, Mary LaRose, Lori Flores, Lauren Koehler; U. Kentucky—Peter E Morris, Jamie Sturgill, Ashley Montgomery-Yates, Evan P Cassity, Sanjay Dhar; Virginia Commonwealth University Medical Center—Marjolein de Wit, Jessica Mason, Aamer Syed; Medical University of South Carolina –Andrew J Goodwin, Abbey Grady, Caitlan Lematty, Charles Terry, Cynthia Oliva ; University of Virginia Medical Center—Kyle Enfield, Mark Sochor, Mary Marshall, Miranda West, Ashley Simpson

**UTAH:** Intermountain Medical Center –Lindsay M Leither, Samuel M Brown\*, Ithan Peltan, Joseph Bledsoe\*, Melissa Fergus, Valerie Aston, Quinn Montgomery, Rilee Smith, Katie Brown, Brent Armbruster, Darrin Applegate; University of Utah Hospital –Estelle Harris, Elizabeth A Middleton, Robert Paine III, Lindsey J Waddoups, Amber Plante, Scott Youngquist

**VANDERBILT Clinical Center:** Duke University Medical Center—John Eppensteiner, Andrew Bouffler, Christopher Cox, Alexander T Limkakeng, Adam Breslin; Louisiana State University Health Sciences Center—Bennett deBoisblanc, Matthew Lammi, Kyle Happel, David Janz, Paula Lauto, Connie Romaine, Marie Childs Sandi; Vanderbilt University Medical Center –Wesley H Self\*, Todd W Rice\*, Matthew W Semler, Jonathan D Casey, Margaret Hays, Adrienne Baughman, Shannon Pugh, Jakea Johnson; University of Alabama Birmingham—David B Page, Derek W Russell, Donna S Harris; University of North Carolina at Chapel Hill—Shannon S Carson, Jason Mock, Eugenia B Quackenbush, Colleen Rice

**Clinical Coordinating Center:** Massachusetts General Hospital Biostatistics Center (CCC): David A Schoenfeld\*, B. Taylor Thompson\*, Douglas L Hayden, Nancy Ringwood, Cathryn Oldmixon, Christine Ulysse, Richard Morse, Ariela Muzikansky, Laura Fitzgerald, Samuel Whitaker, Adrian Lagakos, Weixing Huang, Poying Lai, Haley Morin

**Steering Committee Chair:** Roy G Brower

**National Heart, Lung, and Blood Institute:** Lora A Reineck, Karen Bienstock, Ejigayehu Demissie, Michelle Freemer, James Kiley, Lauren Kunz, Mario Stylianou, Myron Maclawiw, Gail Weinmann

**Protocol Review Committee:** Laurie J Morrison, Daniel Brodie, Charles B Cairns, Mark N Gillespie, Richard J Kryscio, Damon Scales

**Data and Safety Monitoring Board:** Polly Parsons, Jason D Christie, Neal Dickert Jr., Deborah Diercks, Jesse R Hall, Nicholas J Horton, Mitchell Levy, Mark Siegel, Ian Stiell, Laurie S Zoloth

**Advisors to Protocol:** Rinaldo Bellomo, MD; Stephen Macdonald, MD

*\*Clinical Center or CCC Principal Investigator*

## Complete Listing of Study Enrollment Criteria

### Inclusion Criteria

1. Age  $\geq$  18 years
2. A suspected or confirmed infection (broadly defined by administration or planned administration of antibiotics)
3. Sepsis-induced hypotension defined as systolic blood pressure  $<$  100 mmHg or MAP  $<$  65 mmHg or receiving a vasopressor infusion after a minimum of at least 1 liter of fluid

(\*Fluids inclusive of pre-hospital fluids; blood pressure must be below any known or reported pre-morbid baseline).

### Exclusion Criteria

1. More than 4 hours elapsed since meeting inclusion criteria
2. More than 24 hours elapsed since presentation to the hospital
3. Patient already received more than 3 liters of intravenous fluid (includes prehospital volumes)
4. Unable to obtain informed consent
5. Pregnancy
6. Hypotension suspected to be due to non-sepsis cause (e.g. hemorrhagic shock)
7. Blood pressure is at known or reported baseline level
8. Severe Volume Depletion from an acute condition other than sepsis. In the judgment of the treating physician, the patient has an acute condition other than sepsis causing (or indicative) of \*severe volume depletion;

Examples include: Diabetic ketoacidosis, high volume vomiting or diarrhea, hyperosmolar hyperglycemic state, and non-exertional hyperthermia (heat stroke); severe is defined by the need for substantial intravenous fluid administration as part of routine clinical care

9. Pulmonary edema or clinical signs of new fluid overload (e.g. bilateral crackles, new oxygen requirement, new peripheral edema, fluid overload on chest x-ray)
10. Treating physician unwilling to give additional fluids as directed by the liberal protocol\*
11. Treating physician unwilling to use vasopressors as directed by the restrictive protocol\*.
12. Current or imminent decision to withhold most/all life-sustaining treatment; this does not exclude those patients committed to full support except cardiopulmonary resuscitation
13. Immediate surgical intervention planned such that study procedures could not be followed
14. Patient no longer meets the hypotension inclusion criterion (no available SBP  $<$  100 or MAP  $<$  65 within 30 minutes of randomization or not receiving a vasopressor infusion)
15. Prior enrollment in this study

\*Patients will be excluded if the attending physicians believes that either study arm is not good clinical care for his/her patient in their clinical judgement

## Tables

**Table S1.** Additional baseline characteristics

| Characteristic*§                                                    | Fluid Restrictive<br>(N = 782) | Fluid Liberal<br>(N = 781) | Overall (N=1563)     |
|---------------------------------------------------------------------|--------------------------------|----------------------------|----------------------|
| Most common Primary sources of infection -- no. (%) §§              |                                |                            |                      |
| Pneumonia                                                           | 217 (27.7)                     | 205 (26.2)                 | 422 (27.0)           |
| Urinary tract infection                                             | 148 (18.9)                     | 172 (22.0)                 | 320 (20.5)           |
| Skin or soft-tissue infection                                       | 97 (12.4)                      | 82 (10.5)                  | 179 (11.5)           |
| Intra-abdominal infection                                           | 74 (9.5)                       | 72 (9.2)                   | 146 (9.3)            |
| Other source                                                        | 76 (9.7)                       | 71 (9.1)                   | 147 (9.4)            |
| Unknown source                                                      | 170 (21.7)                     | 179 (22.9)                 | 349 (22.3)           |
| Coexisting conditions -- no. (%) ‡                                  |                                |                            |                      |
| Cirrhosis                                                           | 30 (3.9)                       | 33 (4.3)                   | 63 (4.1)             |
| Solid tumors                                                        | 157 (20.2)                     | 140 (18.1)                 | 297 (19.2)           |
| Hematological malignancy                                            | 66 (8.5)                       | 51 (6.6)                   | 117 (7.5)            |
| HIV infection or AIDS                                               | 22 (2.8)                       | 35 (4.5)                   | 57 (3.7)             |
| Prehospital level of Care                                           |                                |                            |                      |
| Home                                                                | 83.9%<br>(655/781)             | 83.2%<br>(650/781)         | 83.5%<br>(1305/1562) |
| Homeless or living in temporary shelter                             | 31 (4.0%)                      | 3.5%<br>(27/781)           | 3.7% (58/1562)       |
| Intermediate care or rehab facility                                 | 28 (3.6%)                      | 3.6%<br>(28/781)           | 3.6% (56/1562)       |
| Nursing facility                                                    | 61 (7.8%)                      | 9.0%<br>(70/781)           | 8.4% (131/1562)      |
| Route of pre-randomization vasopressor administration -- no. (%) ** |                                |                            |                      |
| Central line administration                                         | 49 (30.4)                      | 36 (25.2)                  | 85 (28.0)            |
| Peripheral line administration                                      | 97 (60.2)                      | 95 (66.4)                  | 192 (63.2)           |
| Both                                                                | 15 (9.3)                       | 12 (8.4)                   | 27 (8.9)             |
| Pre-randomization vasopressor use -- no. (%)                        | 161 (20.6)                     | 143 (18.3)                 | 304 (19.4)           |
| Vasopressor type at randomization                                   |                                |                            |                      |
| Norepinephrine                                                      | 143 (18.3)                     | 129 (16.5)                 | 272 (17.4)           |
| Epinephrine                                                         | 6 (0.8)                        | 7 (0.9)                    | 13 (0.8)             |
| Vasopressin                                                         | 6 (0.8)                        | 6 (0.8)                    | 12 (0.8)             |
| Neosynephrine                                                       | 1 (0.1)                        | 2 (0.3)                    | 3 (0.2)              |
| Dobutamine                                                          | 0 (0.0)                        | 1 (0.1)                    | 1 (0.1)              |
| Dopamine                                                            | 1 (0.1)                        | 0 (0.0)                    | 1 (0.1)              |
| ARDS at time of randomization -- no. (%) ††                         | 22 (2.8)                       | 20 (2.6)                   | 42 (2.7)             |



|                                                                                                |            |            |            |
|------------------------------------------------------------------------------------------------|------------|------------|------------|
| Met severe hypotension criteria (Baseline SBP <90 mm Hg or on vasopressor) -- no. (%)£         | 355 (45.4) | 352 (45.1) | 707 (45.2) |
| Pre-randomization invasive mechanical ventilation -- no. (%) ††                                | 53 (6.8)   | 57 (7.3)   | 110 (7.1)  |
| Pre-randomization NIPPV -- no. (%) ††                                                          | 30 (3.8)   | 33 (4.2)   | 63 (4.0)   |
| Pre-randomization assisted ventilation (invasive mechanical ventilation or NIPPV) -- no. (%)†† | 72 (9.3)   | 73 (9.5)   | 145 (9.4)  |
| Laboratory Testing                                                                             |            |            |            |
| WBC count -- 1000/mm <sup>3</sup> ¶                                                            | 13.5±10.5  | 14.1±11.3  | 13.8±10.9  |
| Creatinine -- mg/dL ¶                                                                          | 1.8±1.7    | 1.9±1.9    | 1.9±1.8    |
| Lactate -- mmol/L ¶                                                                            | 2.9±2.5    | 2.9±2.4    | 2.9±2.5    |

\*Unless otherwise indicated, plus–minus values are means ±SD.

§ The protocol includes baseline il6 levels. These were not completed and available at the time of publication. We will report baseline and serial levels in a future publication

§§ 5 patients with ‘COVID-19 confirmed by testing’ were included in pneumonia. ‘Other source’ includes vascular catheter-related infection, central nervous system infection, endocarditis or endovascular infection, flu/other virus confirmed by testing, and other source of infection.

\*\* Route of pre-randomization vasopressor administration was assessed in 304 patients.

‡ Coexisting conditions were assessed in 1550 patients except for HIV infection or AIDS. HIV infection or AIDS was assessed in 1548 patients.

† Subjects may have received more than one vasopressor.

†† ARDS at time of randomization was assessed in 1559 patients.

£ Includes patients on vasopressors at the time of randomization, including 17% in Liberal Fluid Group and 19% in Restrictive Fluid Group

†† Pre-randomization invasive mechanical ventilation and NIPPV/CPAP were assessed in 1559 patients. Pre-randomization assisted ventilation was assessed in 1547 patients.

¶ Baseline WBC, Creatinine, and Lactate were assessed in 1552, 1541 and 1390 patients respectively.

**Table S2.** Initial consent obtained from the patient or from a surrogate

| Variable                         | Restrictive Fluid Group | Liberal Fluid Group | Overall           |
|----------------------------------|-------------------------|---------------------|-------------------|
| Subject                          | 65.5%<br>(512/782)      | 66.7%<br>(521/781)  | 66.1% (1033/1563) |
| Legal Authorized Representatives | 34.5%<br>(270/782)      | 33.3%<br>(260/781)  | 33.9% (530/1563)  |

percent ( N / available records )

**Table S3:** Intravenous Fluid Administration by Study Arm After Protocol Period

| Variable | Restrictive Fluid Group | Liberal Fluid Group   | Difference (95% CI)* |
|----------|-------------------------|-----------------------|----------------------|
| Day 1    | 604 [141, 1463] (717)   | 565 [150, 1481] (739) | 39 (-95, 172)        |
| Day 2    | 782 [200, 1616] (663)   | 800 [236, 1690] (682) | -18 (-164, 128)      |
| Day 3    | 525 [70, 1260] (590)    | 506 [82, 1328] (612)  | 19 (-117, 155)       |
| Day 4    | 450 [50, 1360] (489)    | 480 [50, 1200] (516)  | -30 (-173, 113)      |
| Day 5    | 448 [25, 1293] (421)    | 470 [50, 1120] (433)  | -23 (-162, 117)      |
| Day 6    | 500 [50, 1336] (359)    | 500 [95, 1199] (367)  | 0 (-162, 162)        |
| Day 7    | 440 [30, 1240] (313)    | 451 [51, 1263] (313)  | -11 (-175, 153)      |

\*Confidence intervals have not been adjusted for multiplicity and may not be used for hypothesis testing.

**Table S4.** Types and amounts of fluids received during 24-hour protocol period - Restrictive Fluid Group

| Fluid Type       | Pre-randomization | Hours 0-6        | Hours 6-24      | Hours 0-24         | Pre rand to Hours 24 |
|------------------|-------------------|------------------|-----------------|--------------------|----------------------|
| normal saline    | 1547±673<br>(449) | 696±564<br>(182) | 667±655 (140)   | 894±850 (246)      | 1786±1030<br>(512)   |
| lactated ringers | 1535±610<br>(412) | 905±612<br>(235) | 1213±1155 (177) | 1374±1209<br>(311) | 2111±1341<br>(502)   |
| plasmalyte       | 1390±725 (30)     | 807±576<br>(34)  | 1004±935 (45)   | 1297±1123<br>(56)  | 1504±1226<br>(76)    |
| albumin          | 263±216 (7)       | 363±211<br>(6)   | 458±271 (18)    | 497±327 (21)       | 491±377 (25)         |
| IV medications   | 265±195 (631)     | 291±249<br>(573) | 565±664 (635)   | 750±770 (701)      | 916±801<br>(756)     |
| blood products   | 406±168 (15)      | 437±254<br>(26)  | 589±506 (47)    | 619±499 (63)       | 626±510 (72)         |
| other            | 269±278 (30)      | 265±320<br>(45)  | 583±697 (85)    | 597±781 (103)      | 575±742<br>(121)     |

mean ± standard deviation (N)

**Table S5:** Types and amounts of fluids received during 24-hour protocol period - Liberal Fluid Group

| Fluid Type       | Pre-randomization | Hours 0-6         | Hours 6-24     | Hours 0-24         | Pre rand to Hours 24 |
|------------------|-------------------|-------------------|----------------|--------------------|----------------------|
| normal saline    | 1558±668<br>(450) | 1582±953<br>(315) | 755±701 (190)  | 1689±1184<br>(380) | 2437±1560<br>(551)   |
| lactated ringers | 1515±615<br>(407) | 1977±810<br>(538) | 1213±777 (272) | 2398±1216<br>(581) | 3253±1568<br>(618)   |
| plasmalyte       | 1098±536<br>(28)  | 1684±1006<br>(67) | 1205±861 (49)  | 1791±1094<br>(96)  | 2006±1301<br>(101)   |
| albumin          | 250±212<br>(7)    | 467±606<br>(9)    | 375±305 (25)   | 424±450<br>(32)    | 414±472 (37)         |
| IV medications   | 275±185<br>(619)  | 322±315<br>(564)  | 526±554 (628)  | 726±694<br>(705)   | 903±732 (756)        |
| blood products   | 377±289<br>(10)   | 552±346<br>(45)   | 493±308 (62)   | 630±422<br>(88)    | 651±438 (91)         |
| other            | 175±217<br>(33)   | 233±364<br>(45)   | 469±607 (82)   | 471±638<br>(104)   | 456±613 (120)        |

mean ± standard deviation N

**Table S6.** Adherence to study protocol treatment guidance across time \*

|                                             | 1st quarter of records<br>(mean date:<br>03MAY2018) | 2nd quarter of records<br>(mean date:<br>29JUL2018) | 3rd quarter of records<br>(mean date:<br>28OCT2018) | 4th quarter of records<br>(mean date:<br>26NOV2020) |
|---------------------------------------------|-----------------------------------------------------|-----------------------------------------------------|-----------------------------------------------------|-----------------------------------------------------|
| Restrictive Fluid Group – no./total no. (%) | 43/43 (100)                                         | 43/44 (98)                                          | 52/53 (98)                                          | 45/49 (92)                                          |
| Liberal Fluid Group – no./total no. (%)     | 49/52 (94)                                          | 50/51 (98)                                          | 40/42 (95)                                          | 45/47 (96)                                          |
| Overall – no./total no. (%)                 | 92/95 (97)                                          | 93/95 (98)                                          | 92/95 (97)                                          | 90/96 (94)                                          |

**Table S7.** Description and Impact of Change to Fluid Liberal Protocol in CLOVERS October 2019 Amendment

| Item                                                                                                     | Description                                                                                                                                                                                                                                                                                                                                                                                                                                                                                                                                     |
|----------------------------------------------------------------------------------------------------------|-------------------------------------------------------------------------------------------------------------------------------------------------------------------------------------------------------------------------------------------------------------------------------------------------------------------------------------------------------------------------------------------------------------------------------------------------------------------------------------------------------------------------------------------------|
| Description of fluid cessation during 2000 cc infusion component of Protocol Change to Liberal Fluid Arm | In response to correspondence and input from the Office of Human Research Protections, an amendment to the protocol was made that included adding a clinical evaluation at the end of the first 1000 cc with the following instruction: “If blood pressure and heart rate have normalized (SBP $\geq$ 110 mmHg or MAP $\geq$ 70 mmHg and HR < 90 bpm) and clinical assessment is patient is volume replete, team may forego second liter and move to 500cc boluses based on fluid triggers... otherwise, continue with second 1000 cc infusion” |
| Fluid Liberal Arm Patients Enrolled Before and After Amendment                                           | There were 499 patients enrolled in the fluid liberal arm prior to the amendment and 282 patients enrolled in the fluid liberal arm after the amendment.                                                                                                                                                                                                                                                                                                                                                                                        |
| Number of patients where fluid stopped after first liter                                                 | There were 38/282 (13.5%) patients in the fluid liberal arm after implementation of the amendment who had the 2000cc infusion halted after the first 1000cc for being fluid replete.                                                                                                                                                                                                                                                                                                                                                            |
| Overall Change in 6-hour fluid infusion before and after the amendment                                   | The amount of fluids administered to patients in the fluid liberal arm during the initial 6-hours was a mean $\pm$ SD of 2500 $\pm$ 43 cc in the period before the amendment as compared to 2103 $\pm$ 45 cc after the period of the amendment.                                                                                                                                                                                                                                                                                                 |
| Clinical Impact on Mortality Prior to Discharge Home at 90 days (primary outcome)                        | The mortality rate for the restrictive arm was 13.5% versus 14.7% for the liberal arm prior to the protocol amendment with an absolute difference of -1.2% (95% CI: -5.5 to 3.2%), and 14.9% versus 15.4%, respectively, after the amendment with an absolute difference of -0.5% (95% CI: -6.4% to 5.5%). The p-value for interaction between time period (before vs after the protocol amendment) and mortality prior to discharge home at 90 days (primary outcome) was 0.855. (Figure S6)                                                   |

**Table S8.** ICU admission rate for each study arm\*

| Variable percent ( N )    | Restrictive Fluid Group | Liberal Fluid Group | Difference (95% CI) ‡ |
|---------------------------|-------------------------|---------------------|-----------------------|
| ICU admission hours 0-24£ | 525 (67.3%)             | 462 (59.2%)         | 8.1% (3.3%, 12.8%)    |
| ICU Admission day 0-7££   | 545 (70.0%)             | 480 (61.6%)         | 8.3% (3.7%, 13.0%)    |

\*This is a requested post-hoc analysis

£ Data on ICU admission hours 0-24 were available for 1560 patients (for 780 in the restrictive-fluid group and 780 in the liberal-fluid group).

££ Data on ICU Admission day 0-7 were available for 1558 patients (for 779 in the restrictive-fluid group and 779 in the liberal-fluid group).

‡ Confidence intervals have not been adjusted for multiplicity and may not be used for hypothesis testing.



**Table S9.** DSMB Futility Assessment at Second Interim Analysis

| Stage | Effective Sample Size | Information Proportion (%) | Efficacy - Lower p-value boundary favoring restrictive fluid group | Futility - Lower p-value boundary favoring restrictive fluid group | Futility - Upper p-value boundary favoring liberal fluid group | Efficacy - Upper p-value boundary favoring liberal fluid group | Observed p-value | Action   |
|-------|-----------------------|----------------------------|--------------------------------------------------------------------|--------------------------------------------------------------------|----------------------------------------------------------------|----------------------------------------------------------------|------------------|----------|
| 1     | 834                   | 35.96                      | 0.0004182                                                          | .                                                                  | .                                                              | 0.99958                                                        | 0.20951          | Continue |
| 2     | 1540                  | 66.39                      | 0.00466                                                            | 0.27104                                                            | 0.72896                                                        | 0.99534                                                        | 0.21857          | Continue |
| 3     | 2320                  | 100.0                      | 0.02362                                                            | 0.02362                                                            | 0.97638                                                        | 0.97638                                                        | .                |          |

**Table S10:** Mortality Estimate at 2<sup>nd</sup> Interim

| Variable            | Liberal Fluid Group | Restrictive Fluid Group | Difference  | Overall     | P-value |
|---------------------|---------------------|-------------------------|-------------|-------------|---------|
| Mortality Estimates | 0.150±0.013         | 0.136±0.012             | -.014±0.018 | 0.143±0.009 | 0.437   |

Mortality Estimate ± StdErr

p value is calculated from Wald test

Based on these analyses, the DSMB and NHLBI issued the following statement:

The DSMB unanimously recommended that the CLOVERS study stop. The decision was based on the result that the primary and secondary outcomes did not show any significant difference between the liberal and restrictive arms. The likelihood of showing a significant difference even if a total of 2,320 patients were enrolled is exceedingly small. The additional knowledge to be gained by allowing the study to go to completion did not justify the small risk to participants from continuing the study. The DSMB conclusion was based upon the 90-day mortality estimates, futility analysis, survival curves, secondary analysis, stochastic estimates, and the consent, which states that the objective of the study is to determine whether one approach provides a survival benefit.

#### **NHLBI Determination**

- The DSMB recommended that the trial should stop enrollment
- Stop active intervention under the protocol
- Continue follow up of patients already enrolled
- The DSMB had no safety concerns

**Table S11.** Patient location and vital status to day 90

| Variable                  | Restrictive Fluid Group | Liberal Fluid Group | Overall           |
|---------------------------|-------------------------|---------------------|-------------------|
| Alive but not home yet    | 5.8% (45/782)           | 7.3% (57/781)       | 6.5% (102/1563)   |
| Arrive home alive         | 79.7% (623/782)         | 77.3% (604/781)     | 78.5% (1227/1563) |
| Censored                  | 0.6% (5/782)            | 0.5% (4/781)        | 0.6% (9/1563)     |
| Dead before arriving home | 13.9% (109/782)         | 14.9% (116/781)     | 14.4% (225/1563)  |

percent ( N / available records )

**Table S12.** Reported Adverse events during hospitalization by organ system and severity\*

| Organ System                                         | Severity    | Restrictive Fluid Group | Liberal Fluid Group | Overall | P-value |
|------------------------------------------------------|-------------|-------------------------|---------------------|---------|---------|
| Blood And Lymphatic System Disorders                 | Non-serious | 0                       | 3                   | 3       | 0.763   |
|                                                      | Serious     | 2                       | 0                   | 2       |         |
| Cardiac Disorders                                    | Non-serious | 1                       | 6                   | 7       | 0.013   |
|                                                      | Serious     | 3                       | 10                  | 13      |         |
| Gastrointestinal Disorders                           | Serious     | 2                       | 0                   | 2       | 0.157   |
| General Disorders And Administration Site Conditions | Serious     | 2                       | 5                   | 7       | 0.257   |
| Hepatobiliary Disorders                              | Serious     | 1                       | 0                   | 1       | 0.317   |
| Infections And Infestations                          | Serious     | 2                       | 3                   | 5       | 0.655   |
| Metabolism And Nutrition Disorders                   | Serious     | 1                       | 0                   | 1       | 0.317   |
| Musculoskeletal And Connective Tissue Disorders      | Non-serious | 1                       | 0                   | 1       | 0.317   |
| Nervous System Disorders                             | Non-serious | 1                       | 0                   | 1       | 0.096   |
|                                                      | Serious     | 2                       | 0                   | 2       |         |
| Renal And Urinary Disorders                          | Non-serious | 0                       | 1                   | 1       | 0.317   |
|                                                      | Serious     | 2                       | 0                   | 2       |         |
| Respiratory, Thoracic And Mediastinal Disorders      | Non-serious | 0                       | 4                   | 4       | 0.480   |
|                                                      | Serious     | 1                       | 0                   | 1       |         |
| Skin And Subcutaneous Tissue Disorders               | Serious     | 0                       | 1                   | 1       | 0.317   |
| Vascular Disorders                                   | Non-serious | 1                       | 0                   | 1       | 0.052   |
|                                                      | Serious     | 3                       | 0                   | 3       |         |

\* p values are calculated from weighted Poisson regression. Weight for 'serious' adverse event is 2, weight for 'non-serious' adverse event is 1. unit of the analysis is adverse event.

**Table S13.** Specific adverse events during hospitalization and severity\*

| Organ System                                         | Events                                      | Severity    | Restrictive Fluid Group | Liberal Fluid Group | Overall | P-value |
|------------------------------------------------------|---------------------------------------------|-------------|-------------------------|---------------------|---------|---------|
| Blood And Lymphatic System Disorders                 | Anemia                                      | Non-serious | 0                       | 2                   | 2       | 1.000   |
|                                                      |                                             | Serious     | 1                       | 0                   | 1       |         |
|                                                      | Coagulopathy                                | Non-serious | 0                       | 1                   | 1       | 0.317   |
|                                                      | Thrombocytopenia                            | Serious     | 1                       | 0                   | 1       | 0.317   |
| Cardiac Disorders                                    | Bradycardia                                 | Non-serious | 0                       | 1                   | 1       | 0.317   |
|                                                      | Cardiac Arrest                              | Serious     | 1                       | 2                   | 3       | 0.564   |
|                                                      | Chest Pain                                  | Non-serious | 1                       | 0                   | 1       | 0.317   |
|                                                      | Flash Pulmonary Edema                       | Serious     | 0                       | 1                   | 1       | 0.317   |
|                                                      | Fluid Overload                              | Non-serious | 0                       | 3                   | 3       | 0.020   |
|                                                      |                                             | Serious     | 0                       | 3                   | 3       |         |
|                                                      | Myocardial Ischemia, Elevated Troponin      | Serious     | 0                       | 1                   | 1       | 0.317   |
|                                                      | Polymorphic Vt                              | Serious     | 1                       | 0                   | 1       | 0.317   |
|                                                      | Pulmonary Edema                             | Non-serious | 0                       | 1                   | 1       | 0.096   |
|                                                      |                                             | Serious     | 0                       | 2                   | 2       |         |
|                                                      | Supraventricular Tachycardia                | Serious     | 1                       | 0                   | 1       | 0.317   |
|                                                      | Tachycardia                                 | Serious     | 0                       | 1                   | 1       | 0.317   |
|                                                      | Transfusion Associated Circulatory Overload | Non-serious | 0                       | 1                   | 1       | 0.317   |
| Gastrointestinal Disorders                           | Gastrointestinal Bleeding                   | Serious     | 2                       | 0                   | 2       | 0.157   |
| General Disorders And Administration Site Conditions | Death                                       | Serious     | 1                       | 4                   | 5       | 0.180   |
|                                                      | Multiple Organ Dysfunction Syndrome         | Serious     | 1                       | 0                   | 1       | 0.317   |
|                                                      | Readmit                                     | Serious     | 0                       | 1                   | 1       | 0.317   |
| Hepatobiliary Disorders                              | Cholangitis                                 | Serious     | 1                       | 0                   | 1       | 0.317   |

| Organ System                                    | Events                       | Severity    | Restrictive Fluid Group | Liberal Fluid Group | Overall | P-value |
|-------------------------------------------------|------------------------------|-------------|-------------------------|---------------------|---------|---------|
| Infections And Infestations                     | Cellulitis                   | Serious     | 0                       | 1                   | 1       | 0.317   |
|                                                 | Pneumonia                    | Serious     | 1                       | 0                   | 1       | 0.317   |
|                                                 | Sepsis                       | Serious     | 0                       | 2                   | 2       | 0.157   |
|                                                 | Septic Shock                 | Serious     | 1                       | 0                   | 1       | 0.317   |
| Metabolism And Nutrition Disorders              | Lactic Acidosis              | Serious     | 1                       | 0                   | 1       | 0.317   |
| Musculoskeletal And Connective Tissue Disorders | Rhabdomyolysis               | Non-serious | 1                       | 0                   | 1       | 0.317   |
| Nervous System Disorders                        | Cerebral Infarct             | Serious     | 1                       | 0                   | 1       | 0.317   |
|                                                 | Seizure                      | Serious     | 1                       | 0                   | 1       | 0.317   |
|                                                 | Seizure Vs Syncope Vasovagal | Non-serious | 1                       | 0                   | 1       | 0.317   |
| Renal And Urinary Disorders                     | Hematuria                    | Serious     | 1                       | 0                   | 1       | 0.317   |
|                                                 | Renal Calculus               | Non-serious | 0                       | 1                   | 1       | 0.317   |
|                                                 | Worsening Kidney Failure     | Serious     | 1                       | 0                   | 1       | 0.317   |
| Respiratory, Thoracic And Mediastinal Disorders | Hypoxia                      | Non-serious | 0                       | 1                   | 1       | 0.317   |
|                                                 | Pneumothorax                 | Serious     | 1                       | 0                   | 1       | 0.317   |
|                                                 | Respiratory Failure          | Non-serious | 0                       | 1                   | 1       | 0.317   |
|                                                 | Shortness Of Breath          | Non-serious | 0                       | 1                   | 1       | 0.317   |
|                                                 | Worsening Hypoxia            | Non-serious | 0                       | 1                   | 1       | 0.317   |
| Skin And Subcutaneous Tissue Disorders          | Blisters                     | Serious     | 0                       | 1                   | 1       | 0.317   |
| Vascular Disorders                              | Hypotension                  | Serious     | 1                       | 0                   | 1       | 0.317   |
|                                                 | Peripheral Ischemia          | Serious     | 2                       | 0                   | 2       | 0.157   |
|                                                 | Thrombosis Venous Deep       | Non-serious | 1                       | 0                   | 1       | 0.317   |

\* p values are calculated from weighted Poisson regression. Weight for 'serious' adverse event is 2, weight for 'non-serious' adverse event is 1. unit of the analysis is adverse event.

**Table S14.** Listing of adverse events during hospitalization - Restrictive Fluid Group

| Organ                                                | Events                              | Severity    | Event Day | Unexpected | Study Related                | AE Status When Reported         | Final Outcome                   |
|------------------------------------------------------|-------------------------------------|-------------|-----------|------------|------------------------------|---------------------------------|---------------------------------|
| Blood And Lymphatic System Disorders                 | Anemia                              | Serious     | 7         | Yes        | Definitely not related       | AE present, being treated       | Residual effect / being treated |
|                                                      | Thrombocytopenia                    | Serious     | 2         | No         | Definitely not related       | Recovered                       | Recovered                       |
| Cardiac Disorders                                    | Cardiac Arrest                      | Serious     | 2         | No         | Definitely not related       | Residual effect / being treated | Residual effect / being treated |
|                                                      | Chest Pain                          | Non-serious | 1         | No         | Probably or possibly related | Recovered                       | Recovered                       |
|                                                      | Polymorphic Vt                      | Serious     | 1         | Yes        | Probably not related         | Recovered                       | Recovered                       |
|                                                      | Supraventricular Tachycardia        | Serious     | 1         | No         | Probably or possibly related | Recovered                       | Recovered                       |
| Gastrointestinal Disorders                           | Gastrointestinal Bleeding           | Serious     | 2         | No         | Definitely not related       | Recovered                       | Recovered                       |
|                                                      |                                     | Serious     | 2         | Yes        | Definitely not related       | AE present, being treated       | Recovered                       |
| General Disorders And Administration Site Conditions | Death                               | Serious     | 4         | No         | Probably not related         | Deceased as a result of the AE  | Deceased as a result of the AE  |
|                                                      | Multiple Organ Dysfunction Syndrome | Serious     | 3         | No         | Definitely not related       | AE present, being treated       | Recovered                       |

| Organ                                           | Events                       | Severity    | Event Day | Unexpected | Study Related                | AE Status When Reported        | Final Outcome                  |
|-------------------------------------------------|------------------------------|-------------|-----------|------------|------------------------------|--------------------------------|--------------------------------|
| Hepatobiliary Disorders                         | Cholangitis                  | Serious     | 3         | No         | Definitely not related       | AE present, being treated      | Recovered                      |
| Infections And Infestations                     | Pneumonia                    | Serious     | 5         | No         | Definitely not related       | Deceased as a result of the AE | Deceased as a result of the AE |
|                                                 | Septic Shock                 | Serious     | 0         | No         | Probably not related         | Deceased as a result of the AE | Deceased as a result of the AE |
| Metabolism And Nutrition Disorders              | Lactic Acidosis              | Serious     | 1         | No         | Probably not related         | Deceased as a result of the AE | Deceased as a result of the AE |
| Musculoskeletal And Connective Tissue Disorders | Rhabdomyolysis               | Non-serious | 1         | No         | Probably or possibly related | Recovered                      | Recovered                      |
| Nervous System Disorders                        | Cerebral Infarct             | Serious     | 9         | No         | Probably not related         | Residual effect / no treatment | Residual effect / no treatment |
|                                                 | Seizure                      | Serious     | 0         | Yes        | Definitely not related       | Recovered                      | Recovered                      |
|                                                 | Seizure Vs Syncope Vasovagal | Non-serious | 0         | Yes        | Probably not related         | Recovered                      | Recovered                      |
| Renal And Urinary Disorders                     | Hematuria                    | Serious     | 12        | Yes        | Definitely not related       | AE present, being treated      | AE present, being treated      |
|                                                 | Worsening Kidney Failure     | Serious     | 2         | Yes        | Probably not related         | AE present, being treated      | AE present, being treated      |
| Respiratory, Thoracic And Mediastinal Disorders | Pneumothorax                 | Serious     | 1         | No         | Probably not related         | Recovered                      | Recovered                      |
| Vascular Disorders                              | Hypotension                  | Serious     | 5         | No         | Definitely not related       | Recovered                      | Recovered                      |

| Organ | Events                 | Severity    | Event Day | Unexpected | Study Related                | AE Status When Reported   | Final Outcome                   |
|-------|------------------------|-------------|-----------|------------|------------------------------|---------------------------|---------------------------------|
|       | Peripheral Ischemia    | Serious     | 1         | No         | Probably or possibly related | AE present, no treatment  | Residual effect / being treated |
|       |                        | Serious     | 3         | No         | Probably not related         | AE present, being treated | AE present, being treated       |
|       | Thrombosis Venous Deep | Non-serious | 3         | Yes        | Definitely not related       | AE present, no treatment  | AE present, no treatment        |



**Table S15.** Listing of Adverse events during hospitalization - Liberal Fluid Group

| Organ                                | Events                | Severity    | Event Day | Unexpected | Study Related                | AE Status When Reported        | Final Outcome                   |
|--------------------------------------|-----------------------|-------------|-----------|------------|------------------------------|--------------------------------|---------------------------------|
| Blood And Lymphatic System Disorders | Anemia                | Non-serious | 0         | No         | Probably or possibly related | AE present, no treatment       | AE present, no treatment        |
|                                      |                       | Non-serious | 1         | No         | Probably or possibly related | AE present, being treated      | AE present, being treated       |
|                                      | Coagulopathy          | Non-serious | 2         | Yes        | Definitely not related       | Recovered                      | Recovered                       |
| Cardiac Disorders                    | Bradycardia           | Non-serious | 1         | No         | Probably not related         | Recovered                      | Recovered                       |
|                                      | Cardiac Arrest        | Serious     | 0         | Yes        | Definitely not related       | Deceased as a result of the AE | Deceased as a result of the AE  |
|                                      |                       | Serious     | 0         | Yes        | Definitely not related       | Recovered                      | Recovered                       |
|                                      | Flash Pulmonary Edema | Serious     | 3         | No         | Probably not related         | Recovered                      | Recovered                       |
|                                      | Fluid Overload        | Serious     | 3         | No         | Probably not related         | Recovered                      | Recovered                       |
|                                      |                       | Non-serious | 0         | No         | Probably or possibly related | Recovered                      | Recovered                       |
|                                      |                       | Non-serious | 3         | No         | Probably not related         | Recovered                      | Recovered                       |
|                                      |                       | Non-serious | 6         | No         | Probably or possibly related | AE present, being treated      | Residual effect / being treated |
|                                      |                       | Serious     | 1         | No         | Probably or possibly related | Deceased as a result of the AE | Deceased as a result of the AE  |
|                                      |                       | Serious     | 0         | No         | Probably or possibly related | Recovered                      | Recovered                       |

| Organ                                                | Events                                      | Severity    | Event Day | Unexpected | Study Related                | AE Status When Reported        | Final Outcome                  |
|------------------------------------------------------|---------------------------------------------|-------------|-----------|------------|------------------------------|--------------------------------|--------------------------------|
|                                                      | Myocardial Ischemia, Elevated Troponin      | Serious     | 0         | Yes        | Probably not related         | AE present, being treated      | AE present, being treated      |
|                                                      | Pulmonary Edema                             | Serious     | 0         | No         | Probably or possibly related | AE present, being treated      | AE present, being treated      |
|                                                      |                                             | Serious     | 0         | No         | Probably or possibly related | AE present, being treated      | AE present, being treated      |
|                                                      |                                             | Non-serious | 0         | No         | Probably or possibly related | Recovered                      | Recovered                      |
|                                                      | Tachycardia                                 | Serious     | 0         | No         | Probably not related         | Recovered                      | Recovered                      |
|                                                      | Transfusion Associated Circulatory Overload | Non-serious | 0         | No         | Probably or possibly related | Recovered                      | Recovered                      |
| General Disorders And Administration Site Conditions | Death                                       | Serious     | 5         | No         | Definitely not related       | Deceased as a result of the AE | Deceased as a result of the AE |
|                                                      |                                             | Serious     | 4         | Yes        | Definitely not related       | Deceased as a result of the AE | Deceased as a result of the AE |
|                                                      |                                             | Serious     | 2         | No         | Definitely not related       | Deceased as a result of the AE | Deceased as a result of the AE |
|                                                      |                                             | Serious     | 7         | No         | Definitely not related       | Residual effect / no treatment | Residual effect / no treatment |
|                                                      | Readmit                                     | Serious     | 5         | No         | Definitely not related       | AE present, being treated      | AE present, being treated      |
| Infections And Infestations                          | Cellulitis                                  | Serious     | 35        | Yes        | Probably not related         | AE present, being treated      | AE present, being treated      |
|                                                      | Sepsis                                      | Serious     | 2         | No         | Probably not related         | Recovered                      | Recovered                      |

| Organ                                           | Events              | Severity    | Event Day | Unexpected | Study Related                | AE Status When Reported        | Final Outcome                   |
|-------------------------------------------------|---------------------|-------------|-----------|------------|------------------------------|--------------------------------|---------------------------------|
|                                                 |                     | Serious     | 4         | No         | Probably not related         | Deceased as a result of the AE | Deceased as a result of the AE  |
| Renal And Urinary Disorders                     | Renal Calculus      | Non-serious | 1         | Yes        | Definitely not related       | Recovered                      | Recovered                       |
| Respiratory, Thoracic And Mediastinal Disorders | Hypoxia             | Non-serious | 0         | No         | Probably or possibly related | Recovered                      | Recovered                       |
|                                                 | Respiratory Failure | Non-serious | 1         | No         | Probably or possibly related | Residual effect / no treatment | Residual effect / being treated |
|                                                 | Shortness Of Breath | Non-serious | 0         | No         | Probably or possibly related | Recovered                      | Recovered                       |
|                                                 | Worsening Hypoxia   | Non-serious | 0         | No         | Probably or possibly related | Recovered                      | Recovered                       |
| Skin And Subcutaneous Tissue Disorders          | Blisters            | Serious     | 2         | Yes        | Probably not related         | AE present, being treated      | AE present, no treatment        |

**Table S16.** New ventilation and oxygen use prior to and during the 24-hour protocol period

| New ventilation and oxygen use – no. (%)        | N    |     | Fluid Restrictive (N = 782) | Fluid Liberal (N = 781) | Difference (95% CI)* |
|-------------------------------------------------|------|-----|-----------------------------|-------------------------|----------------------|
| High Flow O <sub>2</sub> (Before Randomization) | 1559 | Yes | 37 (4.7)                    | 41 (5.3)                | -0.5% (-2.7%, 1.6%)  |
| NIPPV/CPAP (Before Randomization)               | 1559 | Yes | 30 (3.8)                    | 33 (4.2)                | -0.4% (-2.3%, 1.6%)  |
| Invasive Ventilation (Before Randomization)     | 1559 | Yes | 53 (6.8)                    | 57 (7.3)                | -0.5% (-3.1%, 2.0%)  |
| New High Flow O <sub>2</sub> (0-6 Hours)        | 1481 | Yes | 18 (2.4)                    | 32 (4.3)                | -1.9% (-3.8%, -0.1%) |
| New NIPPV/CPAP (0-6 Hours)                      | 1496 | Yes | 7 (0.9)                     | 12 (1.6)                | -0.7% (-1.8%, 0.5%)  |
| New Invasive Ventilation (0-6 Hours)            | 1449 | Yes | 24 (3.3)                    | 19 (2.6)                | 0.7% (-1.1%, 2.4%)   |
| New High Flow O <sub>2</sub> (0-24 Hours)       | 1481 | Yes | 24 (3.2)                    | 41 (5.6)                | -2.3% (-4.4%, -0.2%) |
| New NIPPV/CPAP (0-24 Hours)                     | 1496 | Yes | 17 (2.3)                    | 25 (3.4)                | -1.1% (-2.8%, 0.6%)  |
| New Invasive Ventilation (0-24 Hours)           | 1449 | Yes | 45 (6.2)                    | 49 (6.8)                | -0.6% (-3.1%, 1.9%)  |

\*Confidence intervals have not been adjusted for multiplicity and may not be used for hypothesis testing.

**Table S17.** Line complications during hospitalization related to central venous catheter placement among patients who had a central venous line inserted between randomization and 72 hours

| Complications *                                               |     | Fluid Restrictive<br>(N=208) | Fluid Liberal<br>(N=155) | Difference (95% CI) | P-<br>value |
|---------------------------------------------------------------|-----|------------------------------|--------------------------|---------------------|-------------|
| Any line complications of central venous catheter placement † | Yes | 8 (3.8)                      | 6 (3.9)                  | 0.0% (-4.8%, 4.1%)  | 1.000       |
| Catheter-related bloodstream infection                        | Yes | 0 (0.0)                      | 0 (0.0)                  |                     | .           |
| Catheter-related deep vein thrombosis                         | Yes | 1 (0.5)                      | 3 (1.9)                  | -1.5% (-5.1%, 1.0%) | 0.317       |
| Pneumothorax                                                  | Yes | 1 (0.5)                      | 0 (0.0)                  | 0.5% (-1.9%, 2.7%)  | 1.000       |
| Arterial injury                                               | Yes | 0 (0.0)                      | 0 (0.0)                  |                     | .           |
| Venous injury                                                 | Yes | 0 (0.0)                      | 0 (0.0)                  |                     | .           |
| Post-procedural hemorrhage                                    | Yes | 0 (0.0)                      | 0 (0.0)                  |                     | .           |
| Post-procedural hematoma                                      | Yes | 1 (0.5)                      | 0 (0.0)                  | 0.5% (-1.9%, 2.7%)  | 1.000       |
| Ventricular arrhythmia                                        | Yes | 2 (1.0)                      | 1 (0.6)                  | 0.3% (-2.7%, 2.9%)  | 1.000       |
| Atrial arrhythmia                                             | Yes | 5 (2.4)                      | 2 (1.3)                  | 1.1% (-2.4%, 4.4%)  | 0.703       |
| Infusion site extravasation                                   | Yes | 0 (0.0)                      | 0 (0.0)                  |                     | .           |
| Air embolism                                                  | Yes | 0 (0.0)                      | 0 (0.0)                  |                     |             |

\* Significance test is Fisher's Exact Test. Confidence Intervals are estimated by Miettinen-Nurminen method.

**Table S18:** Additional outcomes

| Outcome *                                                                                  | N    | Fluid Restrictive (N = 782) | Fluid Liberal (N = 781) | Difference (95% CI) ‡ |
|--------------------------------------------------------------------------------------------|------|-----------------------------|-------------------------|-----------------------|
| Central venous line insertion between randomization and 72 hours                           | 1559 | 208 (26.7)                  | 155 (19.9)              | 6.8% (2.6%, 11.0%)    |
| Vasopressor infusion through peripheral venous catheter between randomization and 72 hours | 1559 | 310 (39.7)                  | 190 (24.4)              | 15.4% (10.8%, 19.9%)  |

\* The percentage and mean were calculated from the non-missing records.

† Significance test is Fisher's Exact Test. Confidence Intervals are estimated by Miettinen-Nurminen method.

‡ Confidence intervals have not been adjusted for multiplicity and may not be used for hypothesis testing.

**Table S19.** Complications of peripheral venous catheter vasopressor infusion to day 28 among patients who received vasopressors through a peripheral catheter inserted between randomization and 72 hours

| Complications *    |     | Fluid Restrictive<br>(N=310) | Fluid Liberal<br>(N=190) | Difference (95% CI) ‡ | P-value |
|--------------------|-----|------------------------------|--------------------------|-----------------------|---------|
| Site extravasation | Yes | 3 (1.0)                      | 0 (0.0)                  | 1.0% (-1.0%, 2.8%)    | 0.292   |

\* Significance test is Fisher's Exact Test. Confidence Intervals are estimated by Miettinen-Nurminen method.

‡ Confidence intervals have not been adjusted for multiplicity and may not be used for hypothesis testing.

Table S20. Representativeness of study participants in the CLOVERS trial.

| Category                                 | Description                                                                                                                                                                                                                                                                                                                                                                                                                                                                                                                                                                                                                                                                                                                                                                                                                                                                                                                                                                                                                                                                                      |
|------------------------------------------|--------------------------------------------------------------------------------------------------------------------------------------------------------------------------------------------------------------------------------------------------------------------------------------------------------------------------------------------------------------------------------------------------------------------------------------------------------------------------------------------------------------------------------------------------------------------------------------------------------------------------------------------------------------------------------------------------------------------------------------------------------------------------------------------------------------------------------------------------------------------------------------------------------------------------------------------------------------------------------------------------------------------------------------------------------------------------------------------------|
| Disease under investigation              | Sepsis with hypotension; a serious infection with low blood pressure treated at a hospital                                                                                                                                                                                                                                                                                                                                                                                                                                                                                                                                                                                                                                                                                                                                                                                                                                                                                                                                                                                                       |
| Special considerations related to:       |                                                                                                                                                                                                                                                                                                                                                                                                                                                                                                                                                                                                                                                                                                                                                                                                                                                                                                                                                                                                                                                                                                  |
| Sex and gender                           | In the CLOVERS trial, 47% of participants were female. This is consistent with the epidemiology of sepsis, in which approximately half of sepsis cases occur in females and half occur in males. <sup>1-3</sup> During conduct of the trial, we collected sex based on information reported in the hospital medical record system, which usually reflects biological sex assigned at birth. We did not collect information on gender.                                                                                                                                                                                                                                                                                                                                                                                                                                                                                                                                                                                                                                                            |
| Age                                      | In the CLOVERS trial, we enrolled adults (aged $\geq 18$ years old). We did not enroll children because the approach to intravenous fluids and vasopressors is different between adults and children, and in the United States, children and adults are often treated in different hospital settings (e.g., children's hospitals versus adult hospitals). Among adults, sepsis is more common in older people, especially those over 65 years old. Median age for participants in the CLOVERS trial was 59.5 years. This age distribution is similar to estimates for patient with sepsis presenting to the emergency department in the United States. Ranging from 62.7 years <sup>1</sup> to 65.1 years. <sup>3</sup> Table S21                                                                                                                                                                                                                                                                                                                                                                |
| Race or ethnic group                     | Sepsis affects adults of all races and ethnicities. We sought for the CLOVERS population to closely resemble the race and ethnicity distribution of the adult population in the United States. The race and ethnicity distribution of participants in the CLOVERS trial included White 71%, Black 16%, Asian 4%, and Hispanic 15%. The adult population in the 2020 US census (US Census Bureau, <a href="http://www.census.gov">www.census.gov</a> ) included: White 64%, Black 12%, Asian 6%, and Hispanic 17%. These data suggest that compared to the overall adult US population, the CLOVERS trial included slightly more people of White and Black race and slightly fewer people of Asian race and Hispanic ethnicity. Further, these race and ethnicity distributions mirror frequencies amongst patient presenting to emergency departments and admitted for sepsis in the USA. <sup>1-3</sup> Table S21                                                                                                                                                                               |
| Geography                                | This trial was conducted in the United States only. While the results likely generalize well to sepsis care in the United States, they may not generalize to other settings, particularly those in more resource-limited areas without widespread access to advanced critical care medicine. In the CLOVERS trial, we found that use of a restrictive fluids strategy and liberal fluids strategy resulted in similar mortality prior to discharge before day 90 for adults hospitalized with sepsis-induced hypotension. Overall, results of this trial were similar those reported from the CLASSIC 2 trial which was conducted in Europe. <sup>4</sup> However, the results from CLOVERS and CLASSIC 2 were different from recent trials evaluating intravenous fluid volume for sepsis patients in sub-Saharan Africa, including the FEAST trial <sup>5</sup> and the Simplified Severe Sepsis Protocol 2 Trial. <sup>6</sup> Both of these sub-Saharan African trials reported better outcomes for patients treated with a restrictive fluid protocol compared to a liberal fluid protocol. |
| Overall representativeness of this trial | The distributions of sex, age, race, and ethnicity among participants in the CLOVERS trial were similar to those expected for a population of adults in the United States hospitalized with sepsis. Trial results are expected to generalize to the adult population in the United States. The trial did not attempt to enroll children or patients outside the United States, and results may not generalize well to these populations.                                                                                                                                                                                                                                                                                                                                                                                                                                                                                                                                                                                                                                                         |



**Table S21.** Comparison of CLOVERS with Other Studies

|                                           | <b>Wang<sup>1</sup></b><br><b>2009–2011</b> | <b>Ramgopal<sup>2</sup></b><br><b>2016–2018</b> | <b>Chan<sup>3</sup></b><br><b>2016–2019</b> | <b>CLOVERS</b><br><b>2018–2022</b> |
|-------------------------------------------|---------------------------------------------|-------------------------------------------------|---------------------------------------------|------------------------------------|
| <b>Variable</b>                           |                                             |                                                 |                                             |                                    |
| <b>Age (Mean ± SD)</b>                    | <u>62.7±19.8</u>                            | Not reported.                                   | <u>65.1±17.1</u>                            | <u>59.5±15.9</u>                   |
| <b>Male sex (%)</b>                       | <u>44.7</u>                                 | <u>53.2</u>                                     | <u>52.7</u>                                 | <u>52.8</u>                        |
| <b>Race (% of total)</b>                  |                                             |                                                 |                                             |                                    |
| <b>White</b>                              | <u>79.6</u>                                 | <u>79.5</u>                                     | <u>67.2</u>                                 | <u>70.7</u>                        |
| <b>Black</b>                              | <u>17.2</u>                                 | <u>16.7</u>                                     | <u>18.1</u>                                 | <u>15.8</u>                        |
| <b>Other</b>                              | <u>3.2</u>                                  | <u>**</u>                                       | <u>3.3</u>                                  | <u>13.8</u>                        |
| <b>Non-Hispanic ethnicity<sup>a</sup></b> | <u>93.1</u>                                 | <u>89.5</u>                                     |                                             | <u>81.5</u>                        |

Table S21 includes demographics for ED Sepsis visits amongst adults ≥ 18 years old

**Methods:**

To determine the representativeness of the enrolled CLOVERS patient population, we performed a PubMed search focusing on the contemporaneous epidemiology of septic shock amongst adults in North America. We identified 3 studies covering the period of 2011-2019 describing the epidemiology of the adult septic shock population. The overall representativeness of the CLOVERS trial was established by comparing the distributions of sex, age, race, and ethnicity among participants in the CLOVERS trial with those expected for a population of adults predominantly evaluated and managed for sepsis related hypotension and shock in United States.

## Figures

Figure S1. CONSORT flow diagram.

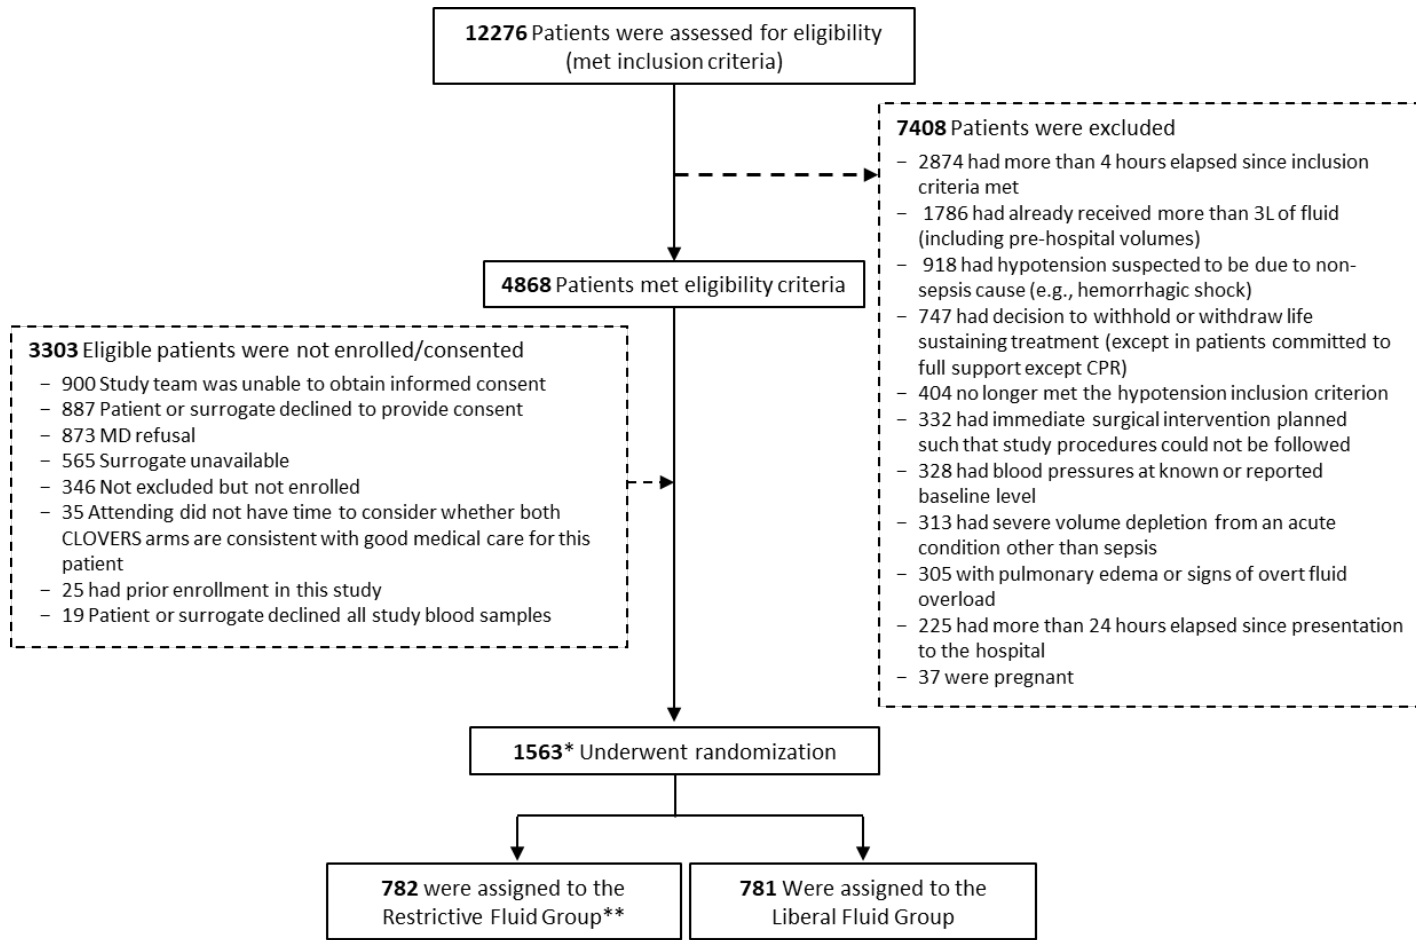

\*One participant was randomized to restrictive and 4 months later randomized to liberal fluid.

\*\*One participant was randomized to restrictive but received liberal fluid.

**Figure S2.** Fluid volumes and vasopressor hours stratified by treatment groups. (a) Fluid volumes during 0-6 hours, (b) fluid volumes during 0-24 hour, (c) total vasopressor hours.

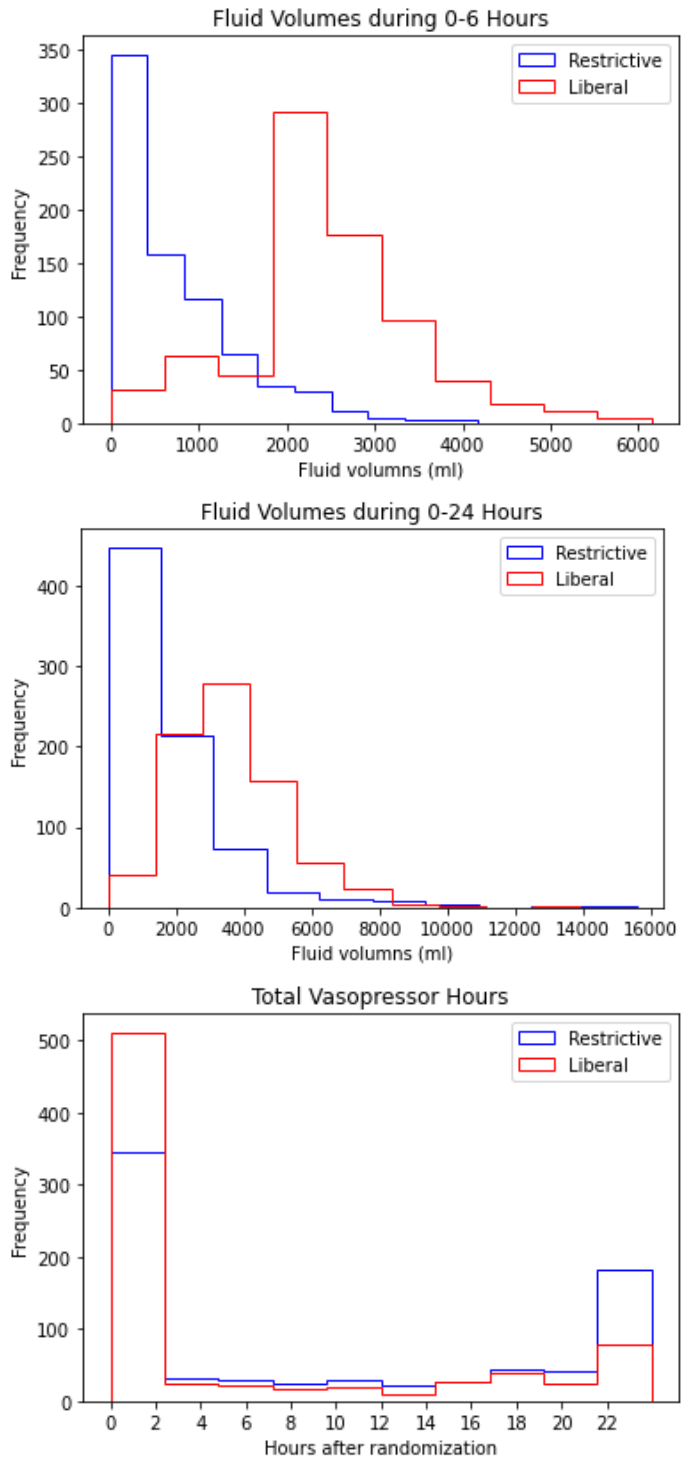

**Figure S3.** Total fluid volume stratified by treatment groups

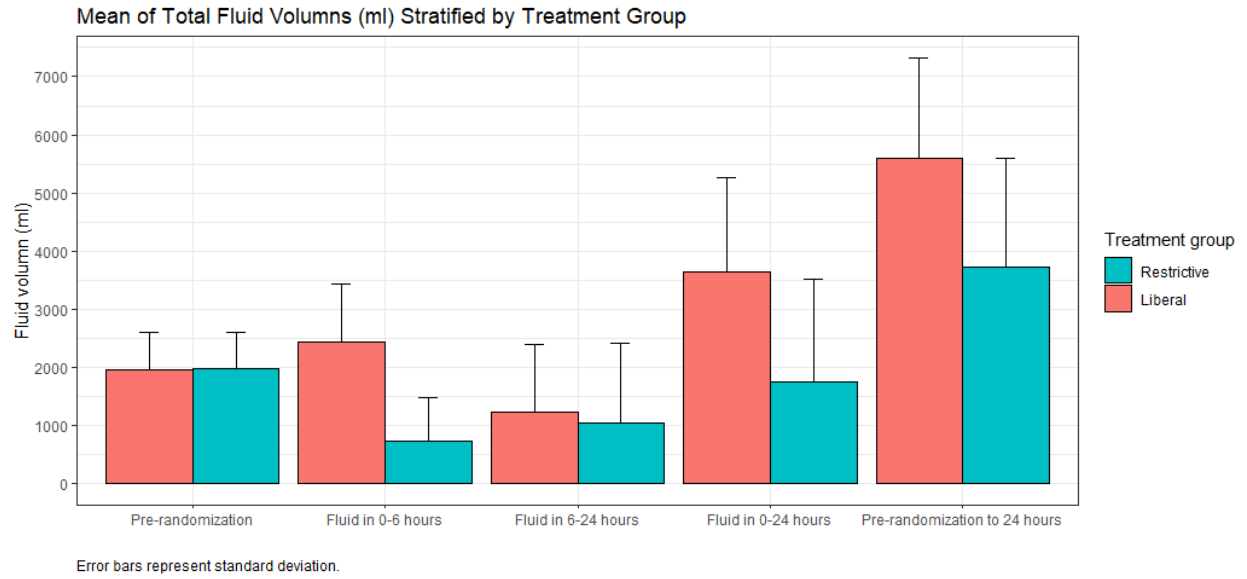

**Figure S4.** Survival curve: patients who survived to discharge home during the first 90 days after randomization.

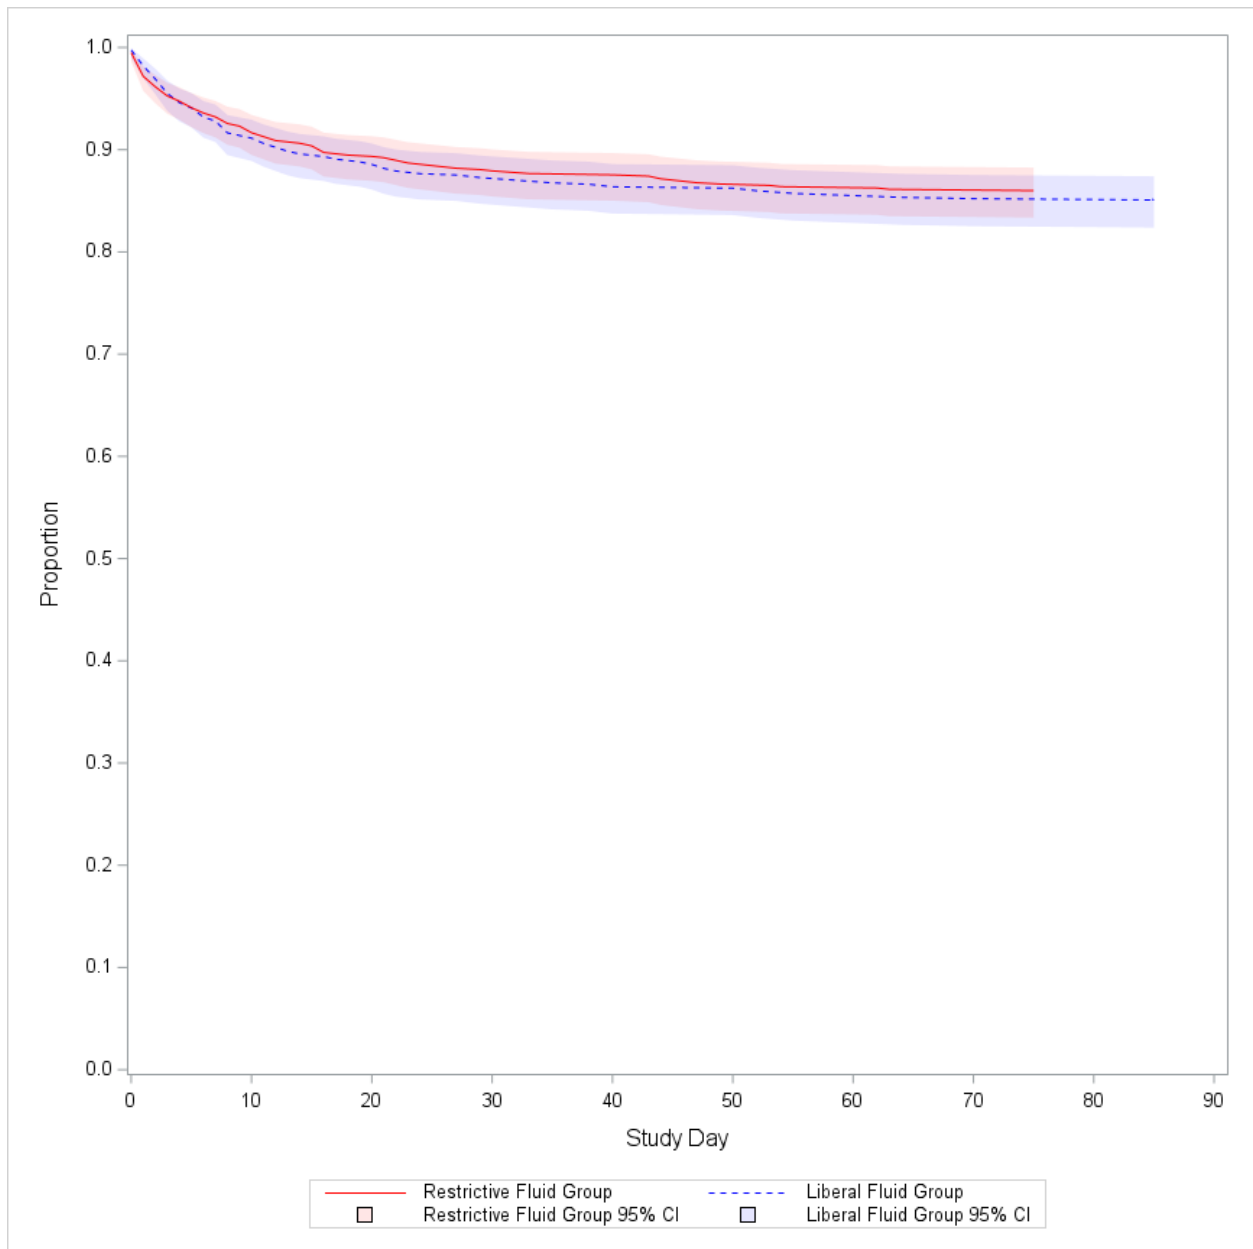

**Figure S5.** Patients who survived to 28-day and were (a) vasopressor-free, (b) ventilator-free and (c) support-free (ventilator-free, vasopressor-free and RRT-free).

(a) Curves for survival and vasopressor freedom.

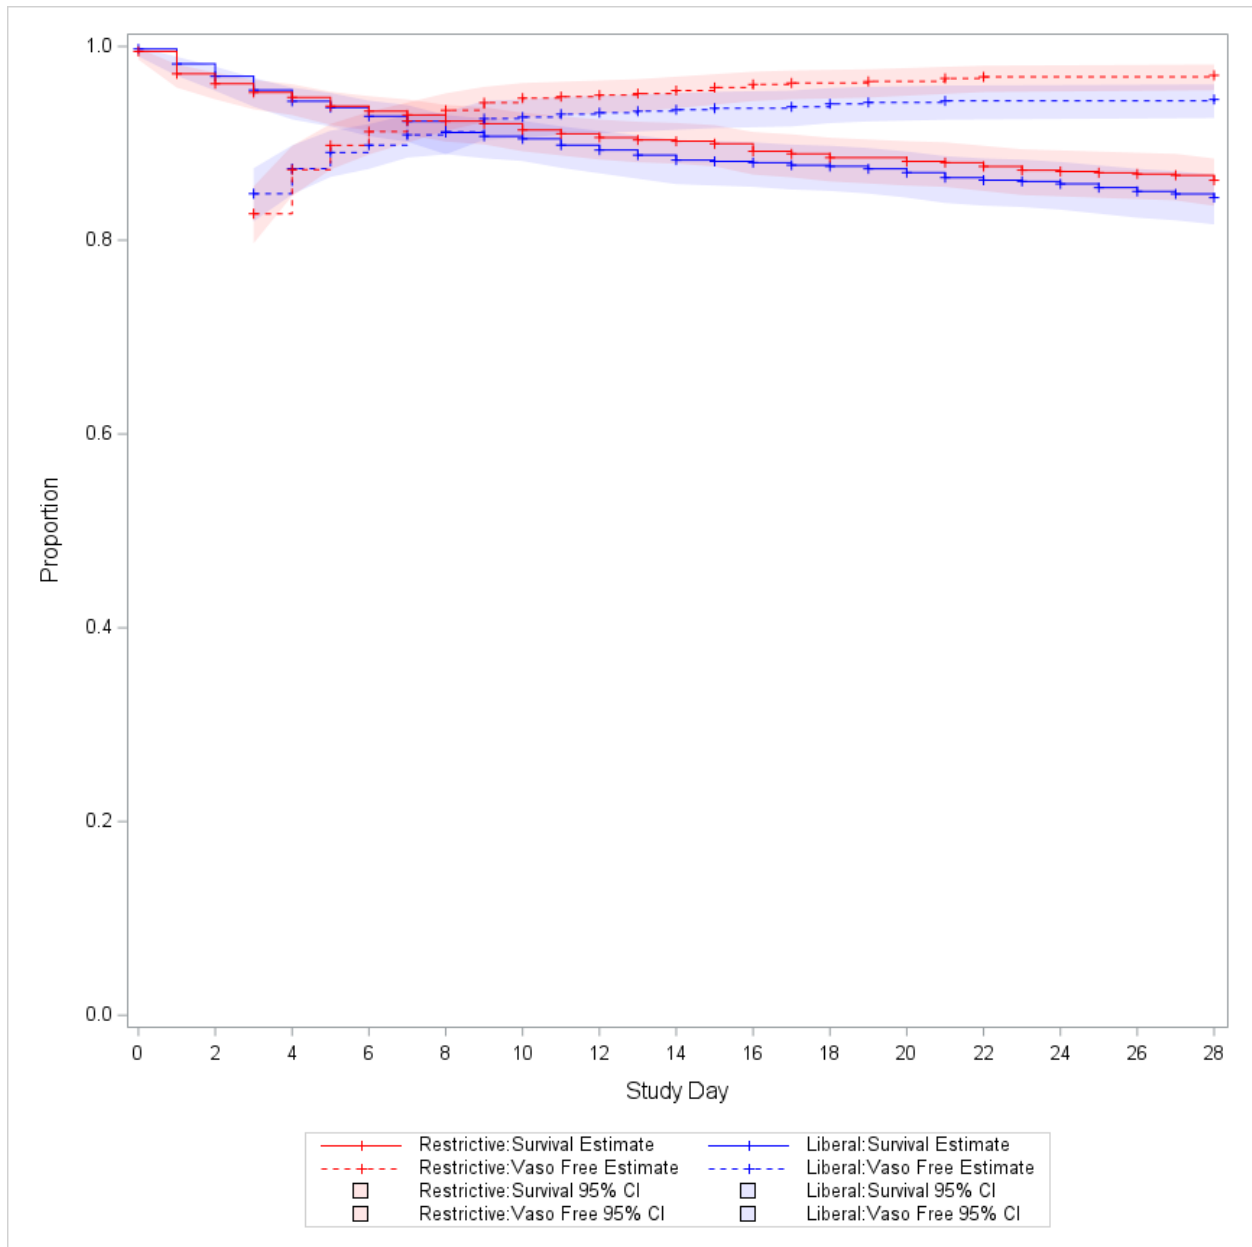

(b) Curves for survival to 28-days and ventilator freedom.

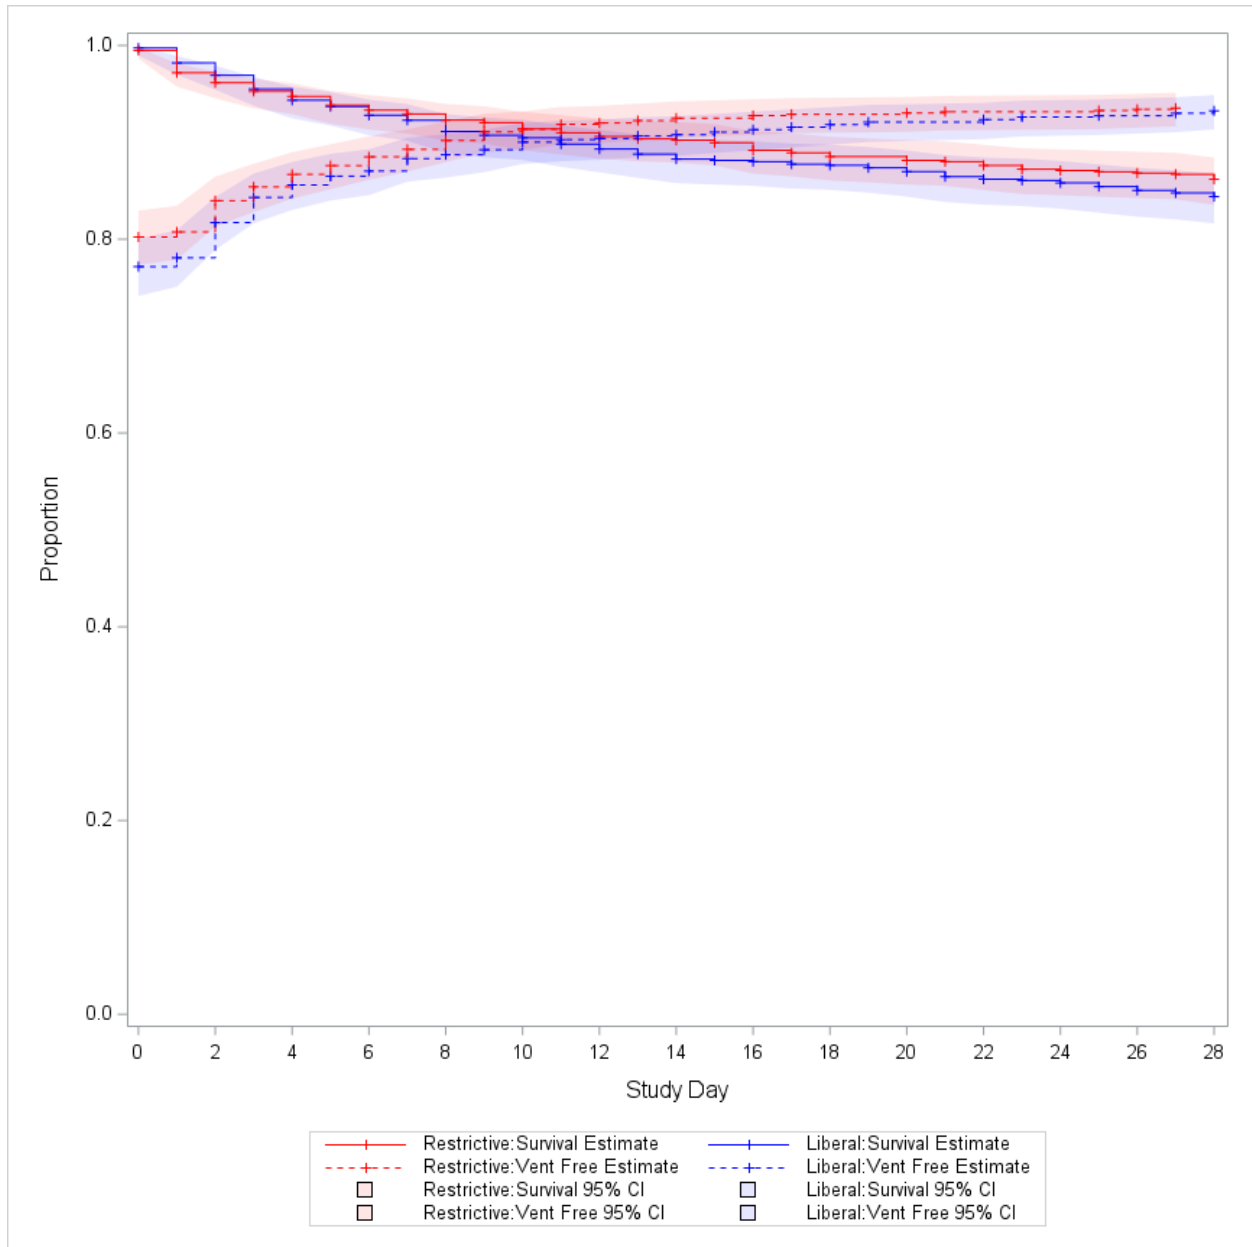

(c) Curves for survival to 28-days and combined vasopressor, ventilator, and renal replacement freedom.

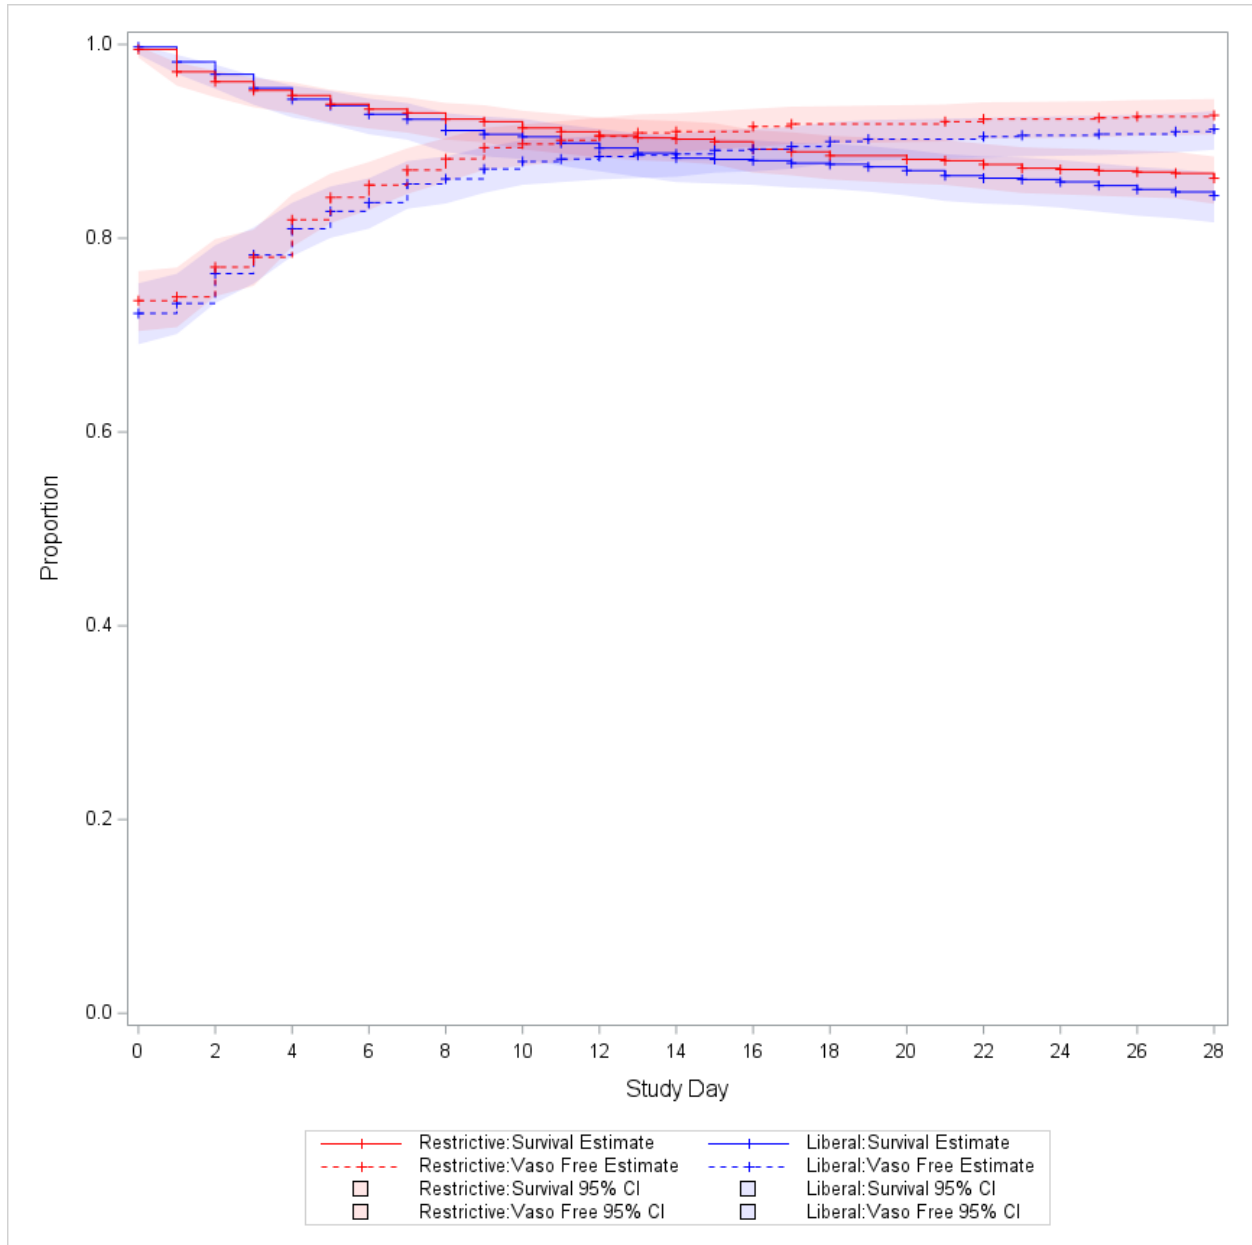

The support-free curves above can cross the survival curves because patients can be free of support and still die prior to Day 28.



**Figure S6.** Additional subgroup analysis ‡.

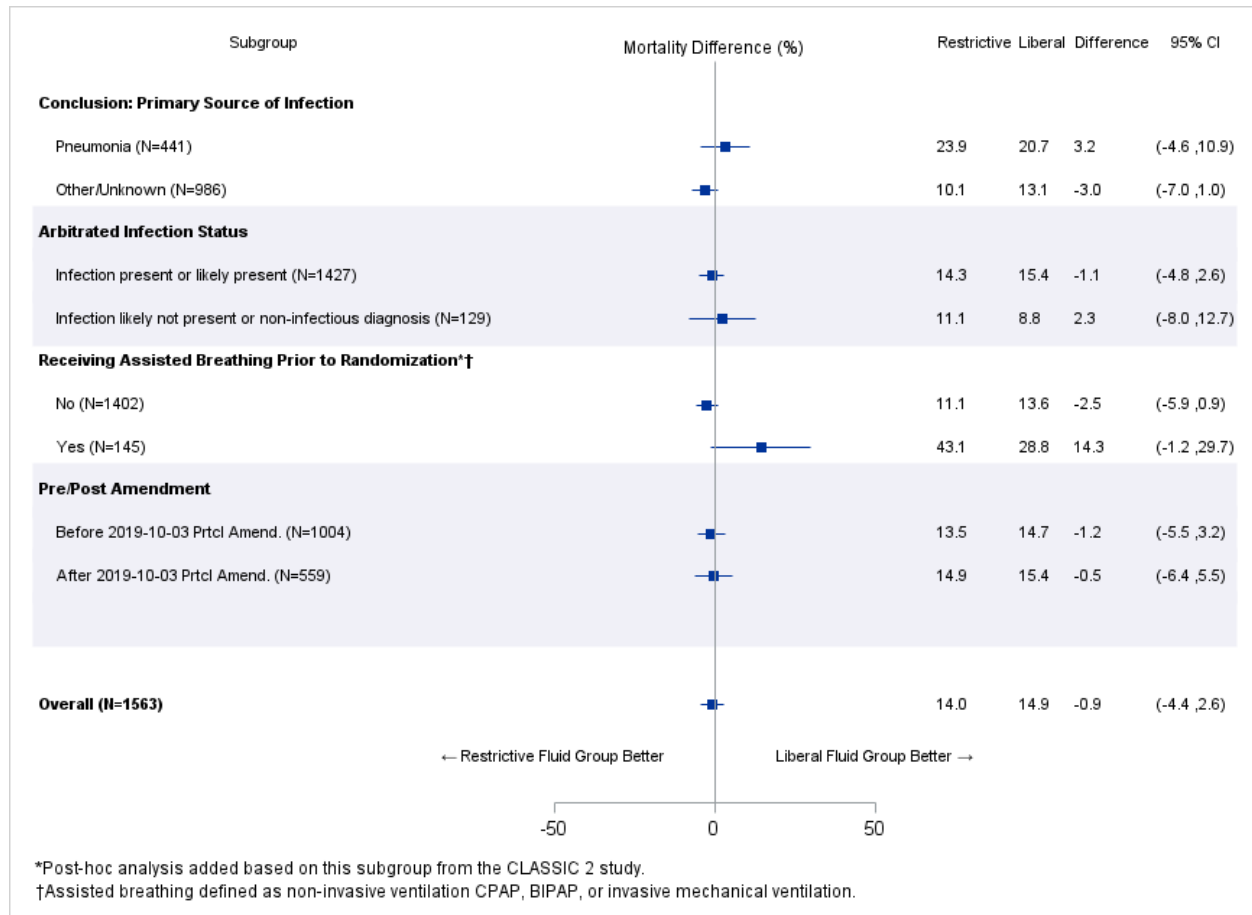

‡ Confidence intervals have not been adjusted for multiplicity and may not be used for hypothesis testing.

Based on results from the CLASSIC II trial<sup>15</sup>, we added an assessment of those receiving assisted breathing (non-invasive or invasive ventilation) at randomization. This subgroup demonstrated a 14.3% (1.2% to 29.7%) absolute difference in mortality prior to discharge home before day 90, favoring the liberal fluid group. This difference is the opposite direction of the CLASSIC II findings which favored their restrictive fluid group receiving assisted ventilation at randomization. Given the findings in differing directions, post-hoc nature in our study, and low power, the data do not currently support a particular approach for this subgroup.

**Figure S7: Risk Difference Stratified by Site‡**

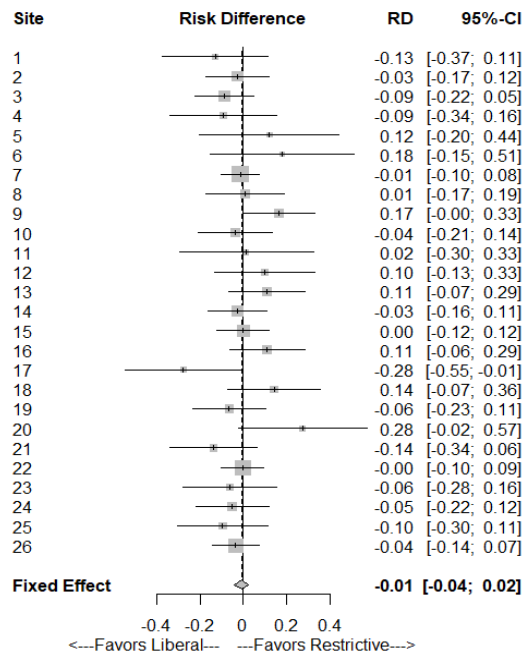

‡ Confidence intervals have not been adjusted for multiplicity and may not be used for hypothesis testing.

**Methods**

Meta-analysis for the primary endpoint by site was performed using the fixed effect model. We excluded 9 censored subjects leaving a total 225 deaths out of 1554 subjects for analysis. We pooled 26 sites with fewer than 20 subjects each into a single site. The pooled risk difference between Restrictive and Liberal groups was estimated by the inverse-variance (IV) method. Cochran’s Q statistic was used to test the heterogeneity by site. Results produced with the R statistical package meta, version 6.0-0.

**Meta-analysis interpretation**

Overall pooled risk difference with 95% confidence interval is -0.0077 (-0.0398, 0.0243). Cochran’s Q statistic is 25.97, we fail to reject the null hypothesis that the true treatment effect is the same across sites

## Supplement References

1. Wang HE, Jones AR, Donnelly JP. Revised National Estimates of Emergency Department Visits for Sepsis in the United States. *Crit Care Med* 2017;45(9):1443-1449. DOI: 10.1097/CCM.0000000000002538.
2. Ramgopal S, Horvat CM, Adler MD. Varying Estimates of Sepsis among Adults Presenting to US Emergency Departments: Estimates from a National Dataset from 2002-2018. *J Intensive Care Med* 2022;37(11):1451-1459. DOI: 10.1177/08850666221080060.
3. Chan HK, Khose S, Chavez S, Patel B, Wang HE. Updated estimates of sepsis hospitalizations at United States academic medical centers. *J Am Coll Emerg Physicians Open* 2022;3(4):e12782. DOI: 10.1002/emp2.12782.
4. Meyhoff TS, Hjortrup PB, Wetterslev J, et al. Restriction of Intravenous Fluid in ICU Patients with Septic Shock. *N Engl J Med* 2022;386(26):2459-2470. DOI: 10.1056/NEJMoa2202707.
5. Maitland K, Kiguli S, Opoka RO, et al. Mortality after fluid bolus in African children with severe infection. *N Engl J Med* 2011;364(26):2483-95. DOI: 10.1056/NEJMoa1101549.
6. Andrews B, Semler MW, Muchemwa L, et al. Effect of an Early Resuscitation Protocol on In-hospital Mortality Among Adults With Sepsis and Hypotension: A Randomized Clinical Trial. *JAMA* 2017;318(13):1233-1240. (In eng). DOI: 10.1001/jama.2017.10913.
